# Supplementary material for: Paradoxical Induction of ALOX15/15B by Cortisol in Human Amnion Fibroblasts: Implications for Inflammatory Responses of the Fetal Membranes at Parturition
Source: MDPI journal article supplement (doi:10.3390/ijms241310881), 2023-06-29
Supplement: s1 [file s1]

## **Contents:**

**Figure S1** Bioinformatic analysis of the promoter regions of *ALOX15* and *ALOX15B* genes.

**Figure S2** Bioinformatic analysis of the promoter region of *EP300* gene.

**Table S1** Demographic and clinical characteristics of recruited pregnant women.

**Table S2** Primer sequences used in qRT-PCR and ChIP.

**Table S3** Antibody information.

[illegible]

## B

-650 TAAATAATGAATGTAGGCTGGGCGCGGTGGCTCACGCCTGTAATCCACGACCTTTGGGAGGCCGAGGCA  
 -580 GCGGATCATGAGGTCAAGAGATCAAGATCATCTTGGCTACATGGTGAACCCGCTCTTACTAAAAATA  
 -510 CAAAATTAGCTGGGCATGTTGGCACTCGCTGTTGTCTCAGTACTGGGAGGCTGAGGTAGGAGAATC  
 -440 ACTTGAAACCAGGAGGAGGAGTTCCAGTGAGCCGAGATCATGCTGCTGCACTCCAGCCTGGCCAGAGAG  
 -370 CAAGCCTCTGTCTCAAAAATAAATAAATAAATTTTAAAAATAATGAACGCAGGCCAAGAAAGATT  
 -300 GTGGGAAATGGGGTGATATTTTGCATAGACTTCTAAGGCTAAGAAGG(AAAACAAACAGAGTGGTGGGC  
 -230 ACAAACTACCCCAACCCCAACTGGGTCCCAACTCTAGGCTCTCTGGCCTGGCACCACCACAGAAAGGCC  
 -160 CCGTTCCCCAAACCTCAGGGTATTCTTAGTCCCTCCTGTTCCAGCGCTGCCAATCCCGCGGCCACCCC  
 -90 ACTTTAGTTGCGTGTTCACGCTCTCCGCGCCGCCCTCCCGGCGTGAAACGGACGTGCTTTTATAGAG  
 -20 AGTCCACTGGGCTTGGAGTCAAGTGGCAATACAGGGGCAATAACCAGGCGTGTTCCAAGGGGGAGCCCC  
 +51 GCTCTGCAGCCCTGTGCGCCGTAGAGAGCTGGACTTAGGCTGGCAGCATGGCCAGTTCAAGGTCAAGGT  
 +121 TCCACCGGAGAAGCCTTCGGGGCTGGCACATGGACAAAGTGCTGTGTCAGCATCGTGGGGACCCGGGA  
 +191 GAGAGCCCCCCACTGCCCTGGACAATCTCGGCAAGGAGTTCACTGCGGGCGCTGTGAGTGCGTGGGAGT

## ALOX15B

**Figure S1. Bioinformatic analysis of the promoter regions of *ALOX15* and *ALOX15B* genes.** (A and B) Bioinformatic analysis of the promoter regions (-650bp ~ +250bp) of *ALOX15* (A) and *ALOX15B* (B) genes revealed multiple putative binding sites for GR and p300. Blue box: GR binding sites; Red box: p300 binding sites. Arrows indicate primer aligning positions in ChIP assay. TSS, transcription start site.

```

-640 GCACGGGCTGAGGCGACCCCCAGCCCCCTCCCGTCCGCACACCCCCACCGCGGTCCAG
-580 CAGCCGGGCGGCGTTCGACGCCTAGGGGGGACCATTACATAACCCCGCGCCCGCGGCGT
-520 CTTCTCCCGCCCGCGGGCGGCCCCGAACGGAGCCCCGGGGGCGGGCGCCCAGCAC
                                CREB
-460 CTGGCCGCCGCGGTGGGGCCGTAGCAGCGGCCGTATTATTATTTCCGCGGAAAG
-400 GAAGGCGAAGGAGGGGAGCGCGGCGGAGGAGGGCCGCCTGCGCCGCCCGGAGCGGG
-340 GCCTCCTCGGTGGGCTCCGCGTCGGCGCGGGCGTGCGGGCGGCGCTGCTCGGCCCGGCC
-280 CCTCGGCCCTCTGGTCCGGCCAGCTCCGCTCCCGGCGTCCTTGCCGCGCCTCCGCCGGCC
-220 GCCGCGGATGTGAGGCGGCGGCGAGCCTGGCTCTCGGCTCGGGCGAGTTCTCTGCGG
                                CREB
-160 CCATTAGGGGCCGCTGCGGCGGCGGCGGCGSAGCGCGCGGCAGGAGAGGGTTCCGA
                                CREB
-100 GGGTGGGGGCGCAGGCCCGGGAGGGGGCACCGGGAGGAGGTGAGTGTCTCTTGTCGCCTC
-40  CTCCTCTCCCCCCTTTTCGCCCCCGCTCCTTGTGGCGATGAGAAGGAGGAGGACAGCGC
                                TSS
+21  CGAGGAGGAAGAGGTTGATGGCGGCGCGGAGCTCCGAGAGACCTCGGCTGGGCAGGGGC
+81  CGGCCGTGGCGGGCCGGGACTGCGCCTCTAGAGCCGCGAGTTCTCGGAATTTCGCCGCA
+141 GCGGACGCGCTCGGCGAATTTGTGCTCTTGTGCCCTCTCCGGGCTTGGGCCAGGCCCC

```

## *EP300*

**Figure S2. Bioinformatic analysis of the promoter region of *EP300* gene.** Bioinformatic analysis of the promoter regions (-640bp ~ +200bp) of *EP300* gene revealed multiple putative binding sites for CREB. Boxed red letters indicate putative CREB binding sites. TSS, transcription start site. Arrows indicate primer aligning positions in ChIP assay.

**Table S1. Demographic and clinical characteristics of recruited pregnant women**

|                                    | TNL (n=7)      | TL (n=7)       | <i>P</i> value |
|------------------------------------|----------------|----------------|----------------|
| Maternal age (year)                | 33.00±2.52     | 32.00±2.58     | 0.48           |
| Gestational age at delivery (week) | 38.96±0.23     | 39.00±0.49     | 0.85           |
| Delivery mode                      |                |                |                |
| Vaginal (%)                        | 0              | 100%           | N/A            |
| C-section (%)                      | 100%           | 0              | N/A            |
| Membrane rupture                   |                |                |                |
| SPOM (%)                           | 0              | 100%           | N/A            |
| ARM (%)                            | 100%           | 0              | N/A            |
| Gravidity median (range)           | 2 (1-5)        | 2 (1-2)        | 0.27           |
| Parity median (range)              | 1 (1-2)        | 1 (1-2)        | 0.12           |
| Fetal gender (male/female)         | 3/4            | 3/4            | 0.78           |
| Birth weight (g)                   | 3395.29±207.12 | 3255.00±143.03 | 0.17           |

TNL, term not in labor; TL, term in labor; ARM, artificial rupture of membranes; C-section, caesarean section; SPOM, spontaneous rupture of membranes with labor. Maternal age, gestational age at delivery, and birth weight were expressed as mean ± SD and analyzed with unpaired Student's t-test. Gravidity and parity were expressed as median (min–max) and analyzed with the Mann–Whitney U test. Fetal gender was analyzed with Chi-square test. Significance was set at  $P < 0.05$ .

**Table S2. Primer sequences used in qRT-PCR and ChIP.**

|         | Gene           | Forward Primer (5'-3') | Reverse primer (5'-3')  |
|---------|----------------|------------------------|-------------------------|
| qRT-PCR | <i>ALOX15</i>  | GAAATTAACGTCCGGGCCA    | CGATTCCTTCCACATACCGAT   |
|         | <i>ALOX15B</i> | CTTCATAGCCACCCTCCAC    | AGGGGCCTTTGGTCTCCA      |
|         | <i>EP300</i>   | TCCGCCAGCGATGGCACAGA   | AGGGGAACCTACCAGATCGCAGC |
|         | <i>GAPDH</i>   | CCCCTCTGCTGATGCCCCCA   | TGACCTTGGCCAGGGGTGCT    |
| ChIP    | <i>ALOX15</i>  | CTGTACCAGGCGTTGATTCC   | AATCAACTCCGCCTACCGCT    |
|         | <i>ALOX15B</i> | AATAACCAGGCGTGTCACAG   | CCACGATGCTGACAGACACT    |
|         | <i>EP300</i>   | CTCCCGTCCGCACACAC      | CTCCTTCGCCTTCCTTTCCC    |

**Table S3. Antibody information**

| Antigen                            | Company        | Catalog # | RRID        | Dilution Concentration |        |       |      |
|------------------------------------|----------------|-----------|-------------|------------------------|--------|-------|------|
|                                    |                |           |             | WB                     | IHC/IF | ChIP  | CoIP |
| <b>ALOX15</b>                      | Thermo Fisher  | MA5-25853 | AB_2722848  | 1:500                  | 1:100  |       |      |
| <b>ALOX15B</b>                     | Thermo Fisher  | PA5-97456 | AB_2812073  | 1:500                  | 1:100  |       |      |
| <b>P300</b>                        | Abcam          | ab14984   | AB_301550   | 1:200                  |        |       | 1:50 |
| <b>t-CREB</b>                      | Cell Signaling | 9104S     | AB_490881   | 1:1000                 |        | 1:50  |      |
| <b>p-CREB (Ser<sup>133</sup>)</b>  | Cell Signaling | 9198S     | AB_2561044  | 1:1000                 |        |       |      |
| <b>t-STAT3</b>                     | Cell Signaling | 9139S     | AB_331757   | 1:1000                 |        | 1:50  |      |
| <b>p-STAT3 (Tyr<sup>705</sup>)</b> | Cell Signaling | 9145S     | AB_2491009  | 1:1000                 |        |       |      |
| <b>Lamin A/C</b>                   | Cell Signaling | 4777S     | AB_10545756 | 1:1000                 |        |       |      |
| <b>GAPDH</b>                       | Proteintech    | 60004-1   | AB_2107436  | 1:10000                |        |       |      |
| <b>H3K27ac</b>                     | Abcam          | ab4729    | AB_2118291  |                        |        | 1:100 |      |
| <b>GR</b>                          | Cell Signaling | 12041S    | AB_2631286  | 1:500                  |        | 1:50  |      |
